# Supplementary material
Source: PubMed Central journal article supplement (PMC6289514)
Supplement: NIHMS1510461-supplement-Supporting_Information.pdf [file NIHMS1510461-supplement-Supporting_Information.pdf]

**ADVANCED  
HEALTHCARE  
MATERIALS**

Supporting Information

for *Adv. Healthcare Mater.*, DOI: 10.1002/adhm.201800225

Thermoreversible Hyaluronic Acid-PNIPAAm Hydrogel  
Systems for 3D Stem Cell Culture

*Barbara L. Ekerdt, Christina M. Fuentes, Yuguo Lei, Maroof  
M. Adil, Anusuya Ramasubramanian, Rachel A. Segalman,  
and David V. Schaffer\**

Supporting Information

**Thermoreversible Hyaluronic Acid-PNIPAAm Hydrogel Systems for 3D Stem Cell Culture**

Barbara L. Ekerdt, Christina M. Fuentes, Yuguo Lei, Maroof M. Adil, Anusuya Ramasubramanian, Rachel A. Segalman, David V. Schaffer\*

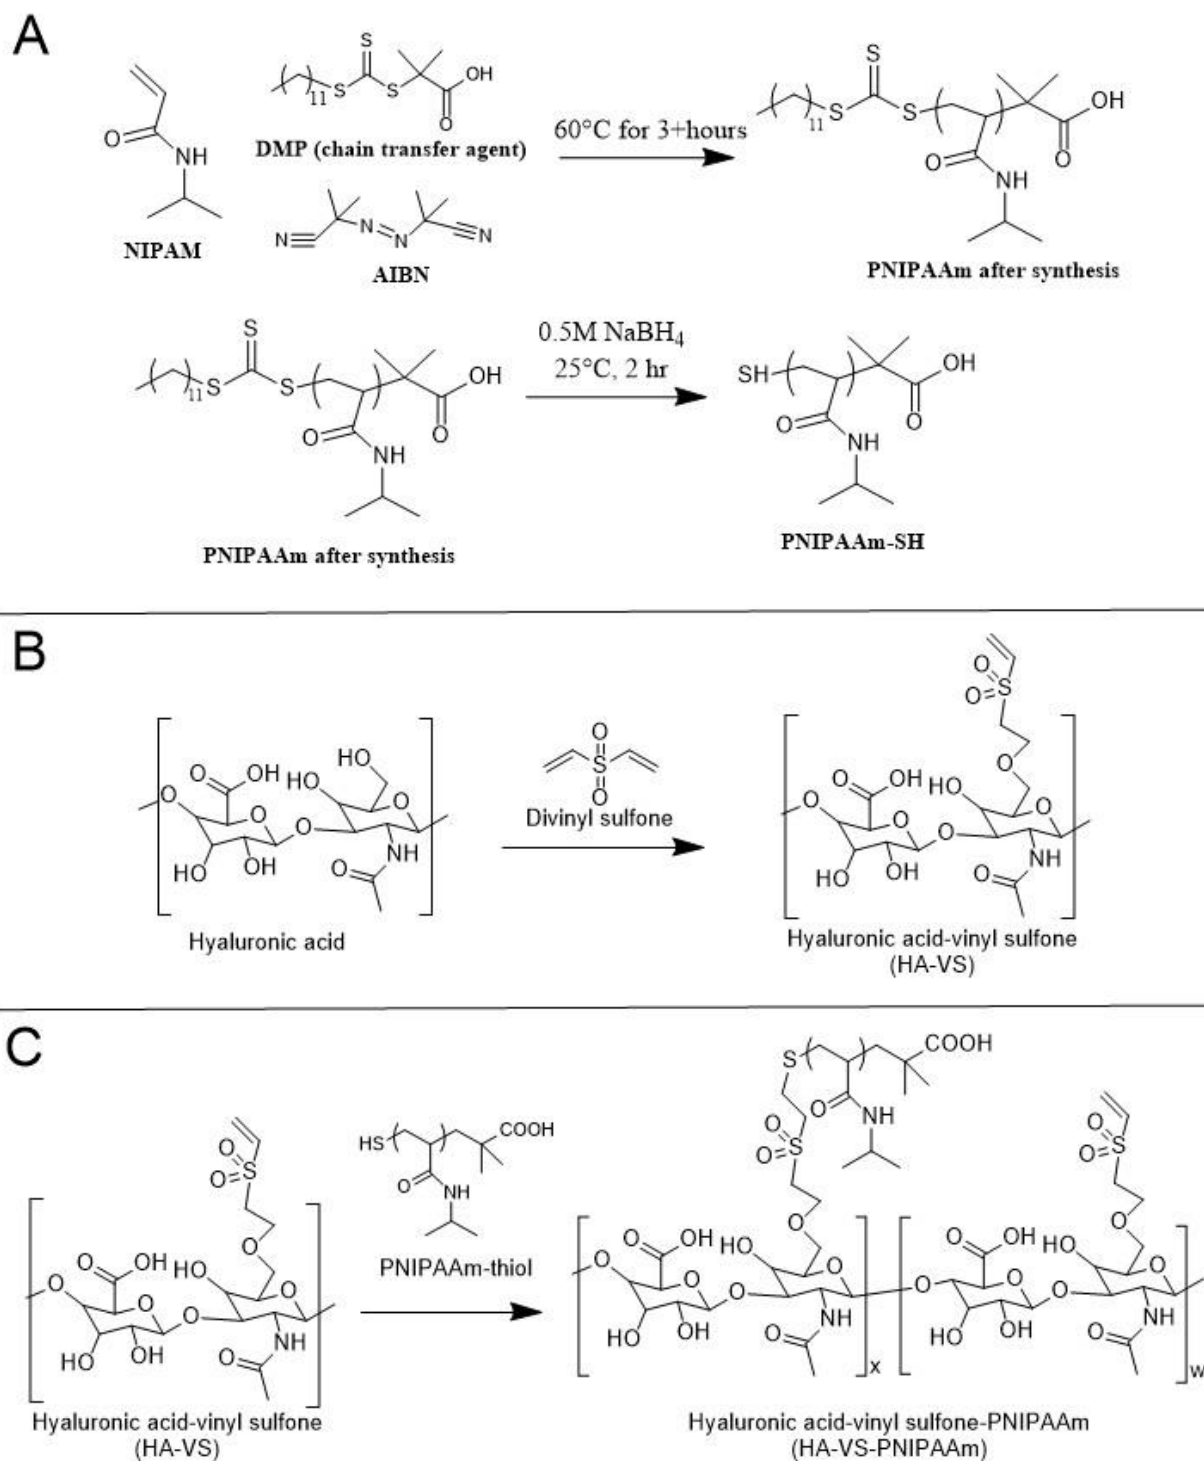

**Figure S1. Polymer synthesis schemes: A. PNIPAAm synthesis via RAFT polymerization followed by thiocarbonythio reduction with NaBH<sub>4</sub> to yield thiols on chain termini. Butyl methacrylate monomer can also be included in the polymerization to create a random copolymer P(NIPAAm-r-BMA)-SH. B. Synthesis scheme of functionalizing HA with divinyl sulfone C. Conjugation of PNIPAAm-SH to vinyl sulfone groups on the HA.**

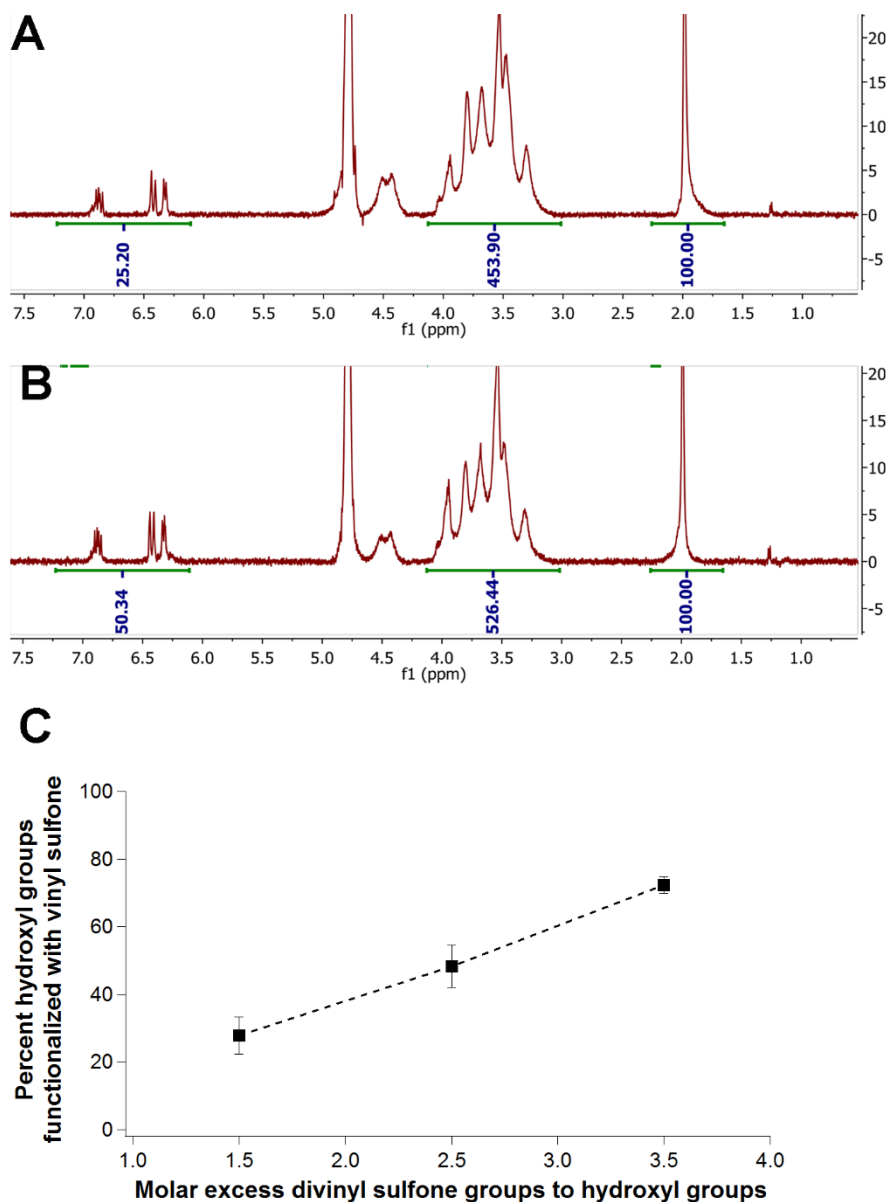

**Figure S2.** <sup>1</sup>H NMR spectra of typical Hyaluronic acid-vinyl sulfone (HA-VS) polymers. The peak around 2.0 ppm reflects three H's in Hyaluronic acid and the peaks between 6.0 and 7.5 represent three H's for vinyl sulfones; setting the integral around 2.0 ppm to a value of 100 allows quantification of vinyl sulfone functionalization. **A.** 1.5x molar excess divinyl sulfone (DVS) to hydroxyl groups produced HA-VS polymers that were approximately 25% functionalized. **B.** 2.5x molar excess DVS to hydroxyl groups

produced approximately 50% functionalized polymers. C. Percent functionalization of HA hydroxyl groups with divinyl sulfone. Error bars indicate standard deviation (n=3)

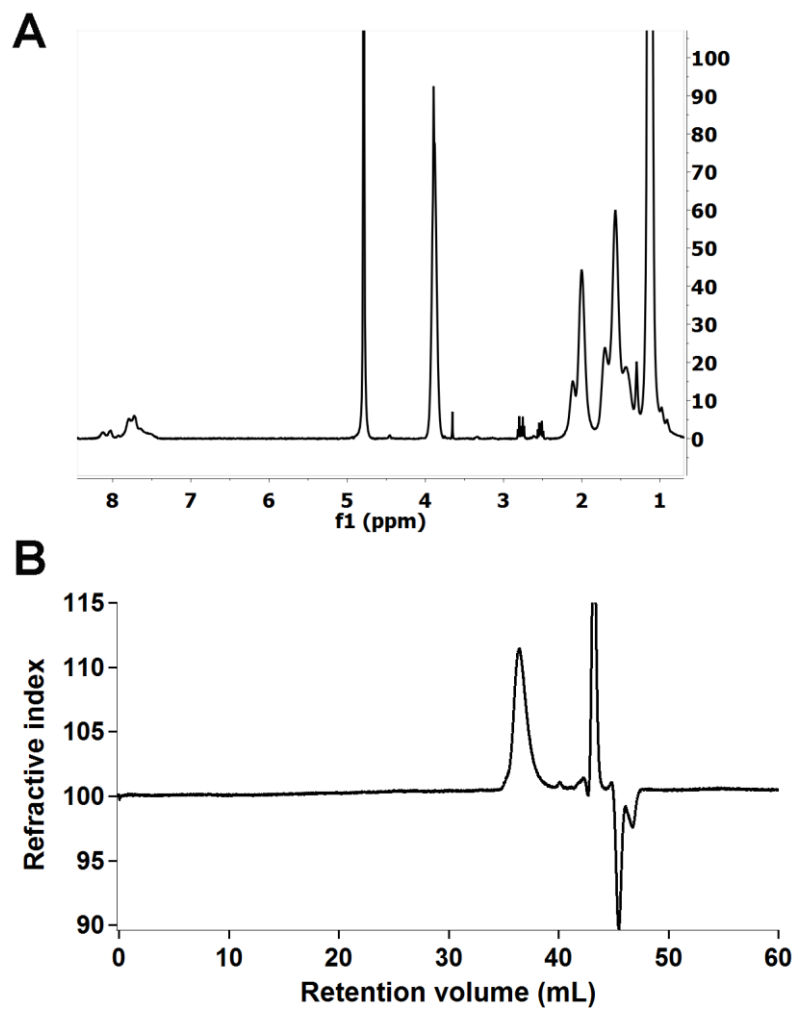

Figure S3. Characterization of synthesized PNIPAAm-SH. A.  $^1\text{H}$  NMR spectrum. B. Gel permeation chromatography (GPC) trace in THF.

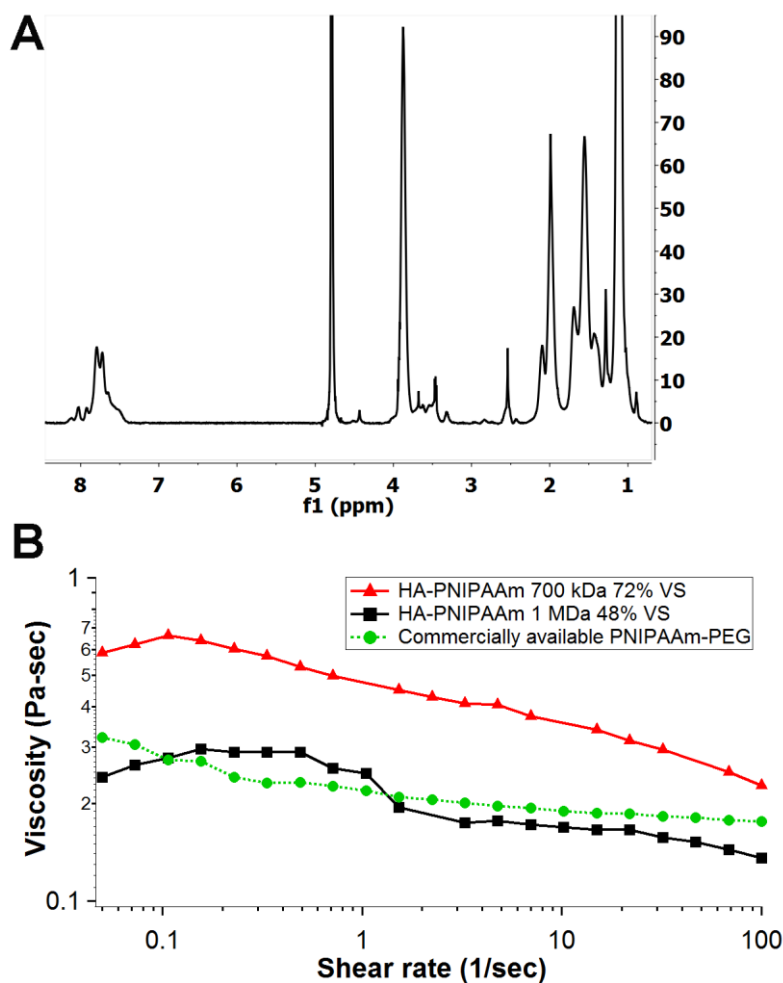

**Figure S4. Characterization of HA-PNIPAAm polymer. A.**  $^1\text{H}$  NMR spectrum of HA-PNIPAAm. **B.** Viscosity sweep for HA-PNIPAAm and commercially available PNIPAAm-PEG at  $4^\circ\text{C}$ . Red triangle: HA-PNIPAAm 700 kDa functionalized 72% with vinyl sulfone groups; Black squares: HA-PNIPAAm 1 MDa functionalized 48% with vinyl sulfone groups; Green circles: Commercially available PNIPAAm-PEG. Hydrogels with 72% VS show higher viscosity through entire range of 0.1-100 Hz despite the smaller HA size, making the hydrogel solution harder to pipette and mix with cells. The 48% VS HA-PNIPAAm hydrogels show similar viscosity behavior as the commercially available PNIPAAm-PEG hydrogel.

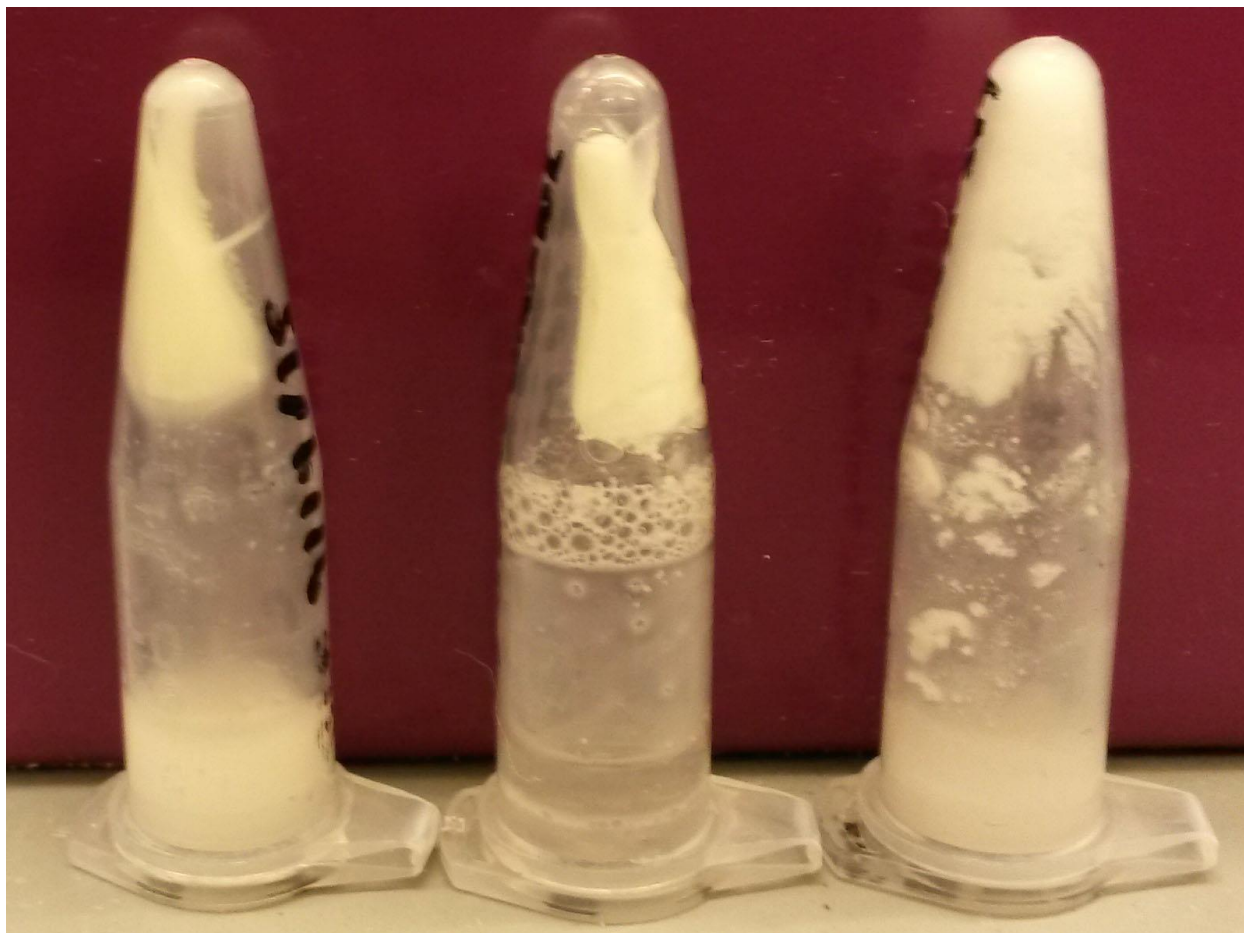

**Figure S5. Examples of polymers that were phase separated at 37°C. Phase separation causing water excretion as well as opaque solids were observed with polymer solutions generated with a high amount of butyl methacrylate, high concentrations of polymer, and high PNIPAAm attachment to the functionalized HA.**

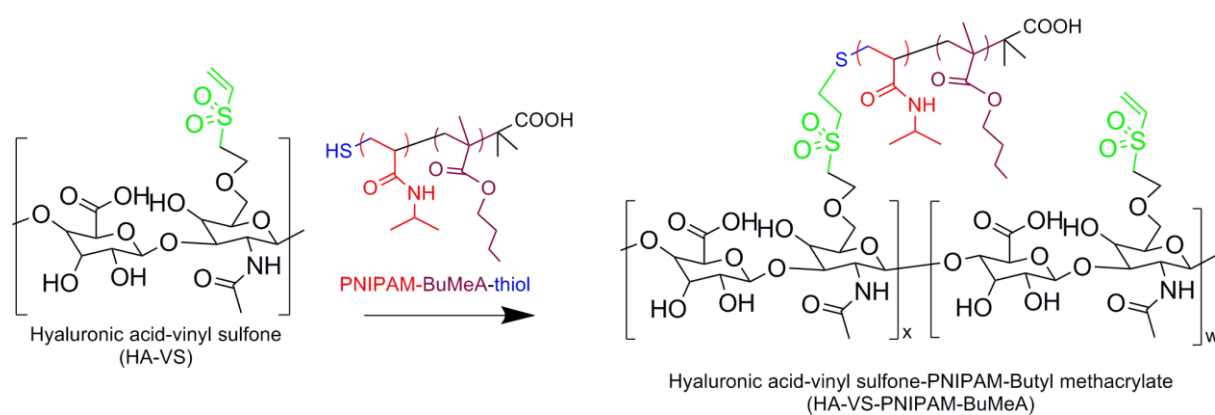

**Figure S6.** Polymer synthesis scheme of HA-VS reacted with P(NIPAAm-r-BMA)-SH to incorporate additional hydrophobic groups.

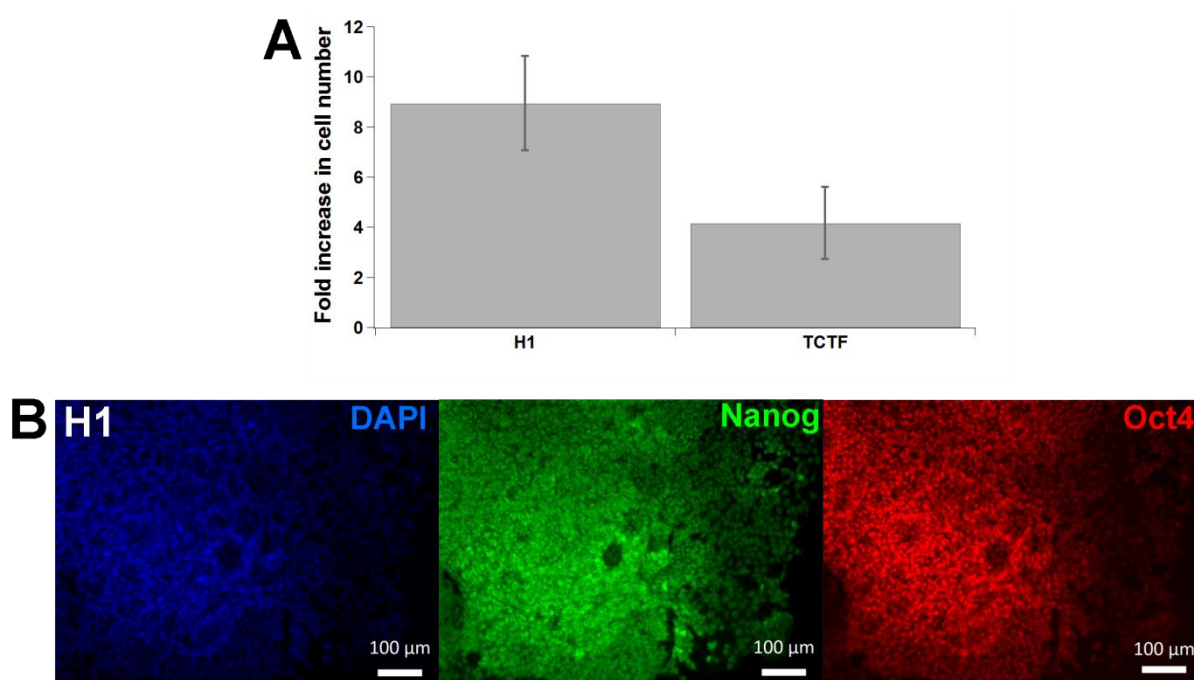

**Figure S7.** Cell expansion rates and antibody staining for first round in HA-PNIPAAm gels. **A.** Cell expansion rate for the first passage for H1 and TCTF hPSCs. Error bars indicate standard error ( $n=3$ ). No statistical difference between cell types based on a  $t$ -test assuming unequal variance and with an  $\alpha$  of 0.05 ( $p$ -value = 0.057). **B.** Antibody staining for pluripotency markers Nanog and Oct4 after the first passage within HA-PNIPAAm gels with H1 hESCs.



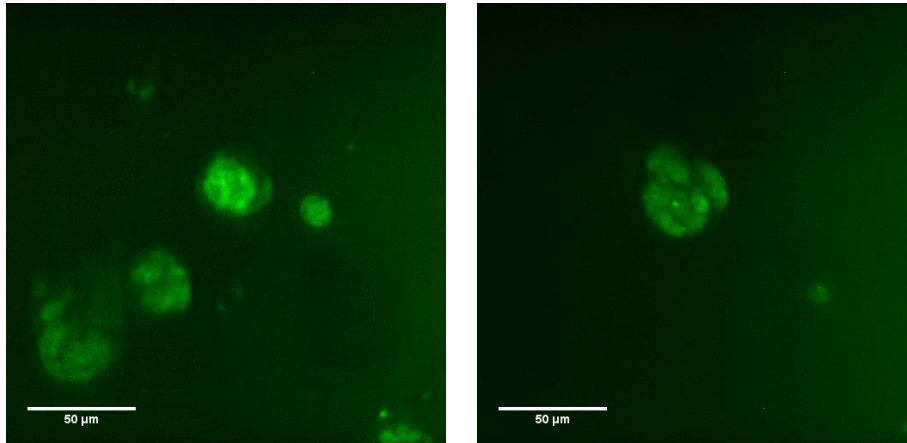

**Figure S8. A GFP tagged Oct4 TCTF reporter cell line captures hPSC growth within the HA-PNIPAAm hydrogel. Images were taken using confocal. Histology of the cells within HA-PNIPAAm is difficult because the hydrogel will melt upon cooling, so a live reporter cell line was used to capture TCTF cell growth within the hydrogel.**
